# Supplementary material for: Crystal habit analysis of LiFePO4 microparticles by AFM and first-principles calculations
Source: Royal Society of Chemistry journal article supplement (doi:10.1039/d2ce00788f), 2022-01-01
Supplement: d2ce00788f1.pdf [file d2ce00788f1.pdf]

Supplementary Information

**Crystal Habit Analysis of  $\text{LiFePO}_4$  Microparticles by AFM and First-Principles Calculations**

The X-ray diffractograms of samples A, B, C, and D corresponding to the crystal habits Wide Diamonds, Narrow Diamonds, Super-Narrow Diamonds, and Cubes are depicted in Figure S1, S2, S3, and S4, respectively. Every Figure depicts the X-ray diffraction pattern of the respective sample (top) with a respective  $\text{LiFePO}_4$  (LFP) reference pattern (bottom). All samples show a complete overlap of all peak positions, indicating crystalline LFP.

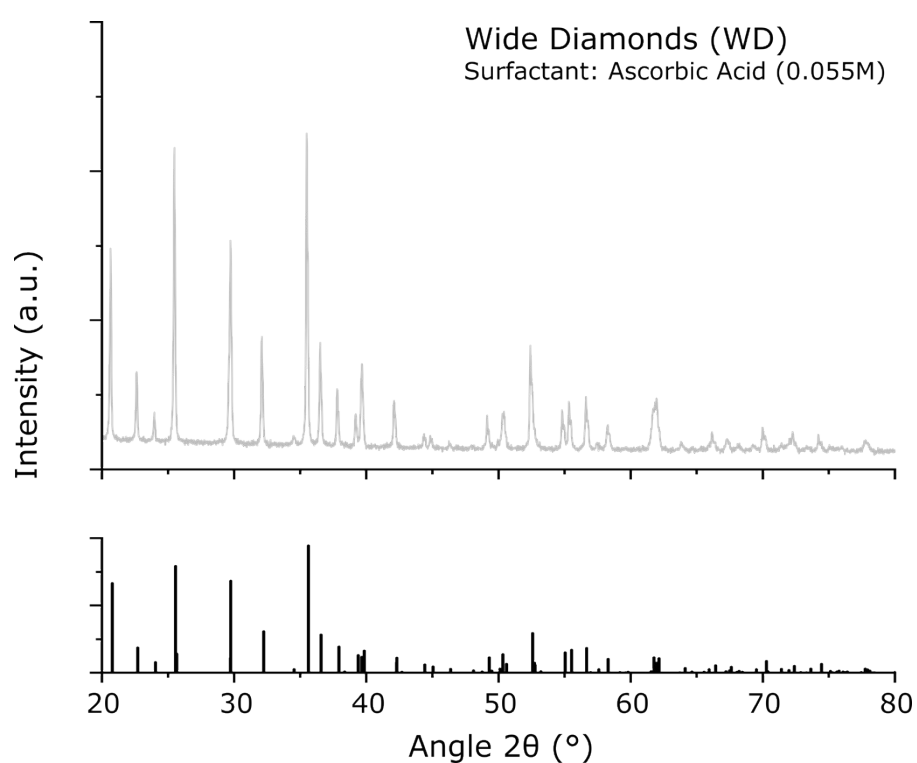

**Figure S1.** X-ray diffraction pattern of sample A with the wide diamond (WD) crystal habit and a reference pattern of  $\text{LiFePO}_4$  (ICSD#92198). We find a full overlap of the peak positions, suggesting the formation of crystalline  $\text{LiFePO}_4$ .

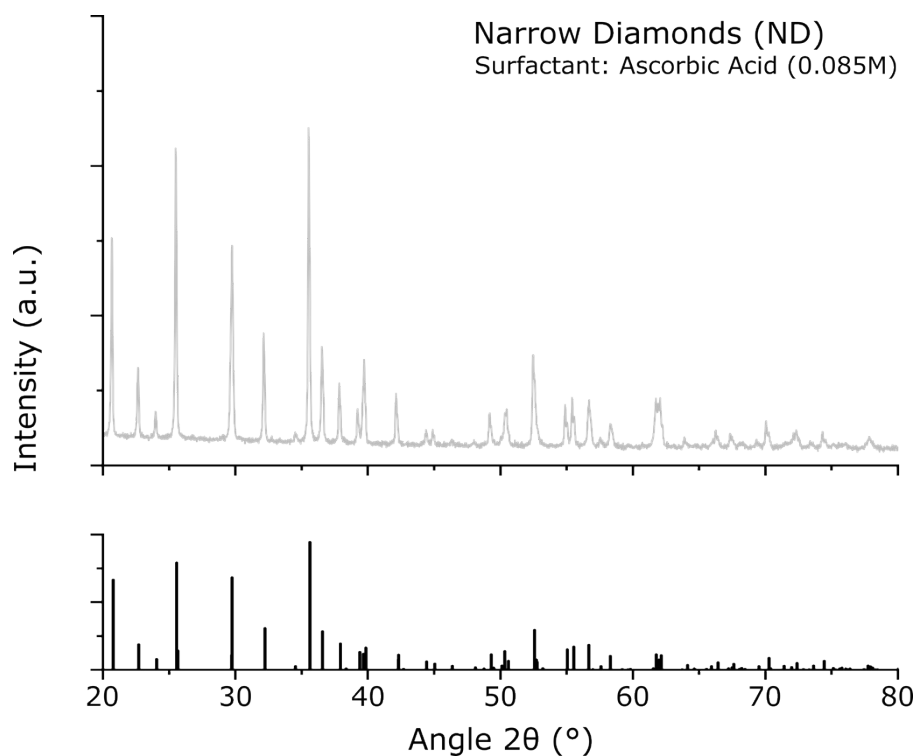

**Figure S2.** X-ray diffraction pattern of sample B with the narrow diamond (ND) crystal habit and a reference pattern of  $\text{LiFePO}_4$  (ICSD#92198). We find a full overlap of the peak positions, suggesting the formation of crystalline  $\text{LiFePO}_4$ .

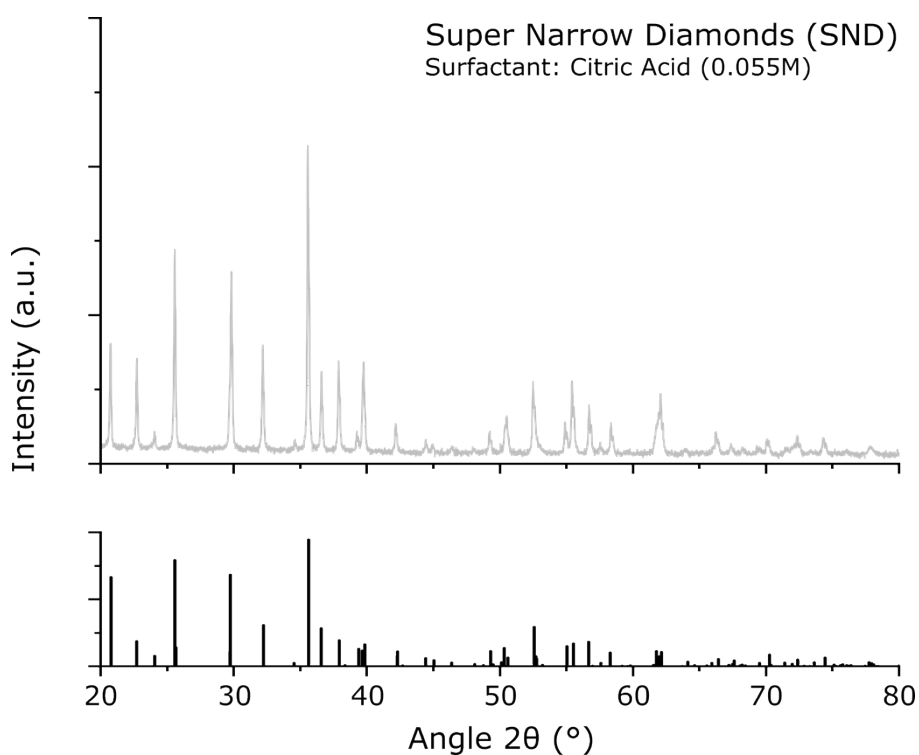

**Figure S3.** X-ray diffraction pattern of sample C with the super narrow diamond (SND) crystal habit and a reference pattern of  $\text{LiFePO}_4$  (ICSD#92198). We find a full overlap of the peak positions, suggesting the formation of crystalline  $\text{LiFePO}_4$ .

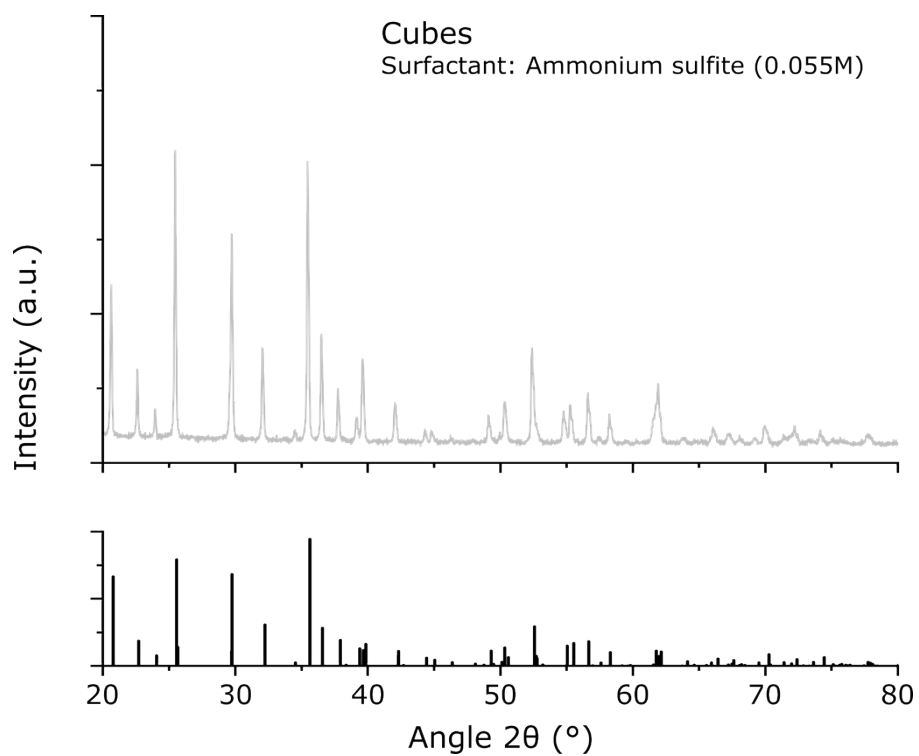

**Figure S4.** X-ray diffraction pattern of sample D and the Cube (CU) crystal habit and a reference pattern of  $\text{LiFePO}_4$  (ICSD#92198). We find a full overlap of the peak positions, suggesting the formation of crystalline  $\text{LiFePO}_4$ .
